# Supplementary material for: P-Type ATPase Apt1 of the Fungal Pathogen Cryptococcus neoformans Is a Lipid Flippase of Broad Substrate Specificity
Source: MDPI journal article supplement (doi:10.3390/jof7100843), 2021-10-08
Supplement: s1 [file s1]

**P-type ATPase Apt1 of the fungal pathogen *Cryptococcus neoformans* is a lipid flippase of broad substrate specificity**

**Lyubomir Dimitrov Stanchev <sup>1,2</sup>, Juliana Rizzo <sup>3</sup>, Rebecca Peschel <sup>1</sup>, Lilli Pazurek <sup>1</sup>, Lasse Bredegaard <sup>2</sup>, Sarina Veit <sup>1</sup>, Sabine Laerbusch <sup>1</sup>, Marcio L. Rodrigues <sup>3,4</sup>, Rosa L. López-Marqués <sup>2</sup>, Thomas Günther Pomorski <sup>1,2,\*</sup>**

**Supplementary Information**

This file includes all supplementary information for the manuscript:

- Figures S1, S2 and S3

- Tables S1

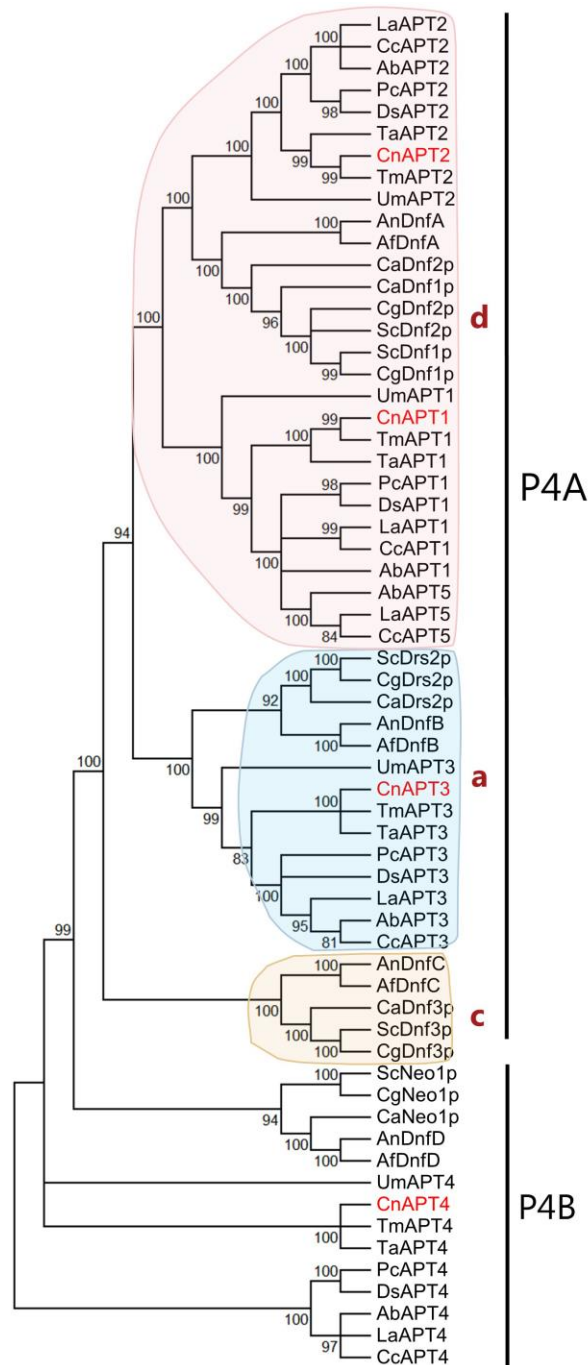

**Supplementary Figure S1. Phylogenetic relations amongst fungal P4 ATPases.** Phylogenetic tree of sequences representing all annotated P4-ATPases from selected yeast and fungi: *Saccharomyces cerevisiae* (Sc), *Cryptococcus neoformans* (Cn); *Candida albicans* (Ca), *Candida glabrata* (Cg), *Aspergillus nidulans* (An), *Aspergillus fumigatus* (Af), *Tremella mesenterica* (Tm), *Trichosporon asahii* (Ta), *Agaricus bisporus* (Ab), *Ustilago maydis* (Um), *Phanerochaete carnos* (Pc), *Laccaria amethystine* (La), *Coprinopsis cinerea* (Cc), *Dichomitus squalens* (Ds). The phylogenetic tree was inferred from maximum likelihood analysis with 1,000 bootstrap iterations performed using Mega X. Node values represent maximum likelihood statistical values with a maximum of 100%. All nodes with statistical values less than 80% were collapsed into multifurcations. In the phylogenetic tree, proteins from *C. neoformans* are indicated in red. Colored balloons indicate proteins that belong to the same phylogenetic cluster (small dark red letters), as described in [Palmgren et al., 2019, Biochim Biophys Acta Biomembr. 1861:1135-1151]. For accession numbers, see Materials and methods.

|         |              |              |             |              |             |               |             |             |      |
|---------|--------------|--------------|-------------|--------------|-------------|---------------|-------------|-------------|------|
| ScDnf1p | MSGTF----    | -----HGDDG   | HAP-----MS  | PFEDTFQFED   | NSS-NEDTHI  | APTHFDDGAT    | SNKYSRP--   | -----QVS    | 53   |
| ScDnf2p | MSSPSKPTSP   | FVDDIEHESG   | SASNGLSSMS  | PFDDSFQFEK   | PSSAHGNIEV  | AKT---GGSV    | LKRQSKPMKD  | ISTPDL SKVT | 77   |
| CnAPT1  | MGA-----     | -----        | -----       | -----        | -----       | -----         | -----SKP    | -----       | 6    |
| ScDrs2p | MNDRETTPK    | RKPGEDD--    | -----T      | LFDIDFLDDT   | TSHSGSRSKV  | TNSHANGYI     | PPSHVLPEET  | IDL-----    | 61   |
| ScDnf1p | FN--DETPK    | NKREDAEFT    | -----FN     | DDTEYDNHSF   | QPTPKLNNGS  | GTFFDDVELDN   | DSGEPHTNYD  | G-----MKRF  | 117  |
| ScDnf2p | FDGIDDYSDN   | NDINDDDELN   | GKKTEIHEHE  | NEVDDDLHSF   | QATPMPNTGG  | --FEDVELDN    | NEG---SNND  | SQADHKLKRV  | 152  |
| CnAPT1  | -----        | -----        | -----       | -----        | -----PL--   | -----         | -----       | -----       | 8    |
| ScDrs2p | -----DADD    | NIENDVHE--   | -NLFMSNNHO  | DQTSWNANRF   | -----       | -----DS       | DAYQPQSLRA  | VKPPGLFARF  | 115  |
| ScDnf1p | RMGTRKRNKKG  | NPIMGRSKTL   | KWARKNI PNP | FEDF-TKDD-   | IDPGAT---N  | RAQEL-RTVY    | YNMPLPKDMI  | DEEGN-----  | 186  |
| ScDnf2p | RFGTRRNKSG   | RIDINRSKTL   | KWAKKNFNHA  | IDEFSTKEDS   | LENSAL--QN  | RSDEL-RTVY    | YNLPLPEDML  | DEEDGL----- | 224  |
| CnAPT1  | -----VPRSKKH | NP-----      | SWLDRNIVKP  | LE-----S     | LAPSKLFARR  | RSPPVPRSVF    | INEPLPSEYY  | DKKKG-----  | 65   |
| ScDrs2p | GNGLKNAATF   | K-----RKGGP  | ESFEMNHNA   | VTN-----NE   | LDDNYLDSRN  | KFN--IKILF    | NRYLRLKNVG  | DAENGGEPRV  | 184  |
| ScDnf1p | -----PIM     | Q--YPRNKIR   | TTKYTPLTFL  | PKNILFQFHN   | FANVYFLVLI  | ILGAFQIFGV    | TNPGLSAVPL  | VVIVITAIK   | 257  |
| ScDnf2p | -----PLA     | V--YPRNKIR   | TTKYTPLTFF  | PKNILFQFHN   | FANIYFLILL  | ILGAFQIFGV    | TNPGFASVPL  | IVIVITAIK   | 295  |
| CnAPT1  | -----ILR     | AHFATNQNV    | TSKYTVITFI  | PKNLFEQFSR   | VANCFFLAIS  | ILQFPKPFST    | ISPLGLVILPL | IIVLAITALK  | 138  |
| ScDrs2p | IHINDSLANS   | SFGYSDNHIS   | TTKYNFATFL  | PKFLFQEFRR   | YANLFLFCTS  | AIQQVPHVSP    | TNRYTITIGTL | LVVLIVSAAK  | 264  |
| ScDnf1p | DAIEDSRRTV   | LDLEVNNTKT   | HILEGVENEN  | VSTDNISLWR   | RFKKANSRLL  | FKFIQYCKEH    | LTEEGKKKRM  | QKRHRELVRQ  | 337  |
| ScDnf2p | DGIEDSRRTV   | LDLEVNNTKT   | HILSGVKNEH  | VAVDNVSLWR   | RFKKANTRAL  | IKIFEYFSEN    | LTAAGREKKL  | VKKREELRRK  | 375  |
| CnAPT1  | DGYEDIKRHQ   | ADHRTNHAI    | VHVLGGQDYTN | -----Q       | NPMASKDKTF  | IPAIPLPKR--   | -----RSKKA  | KKAEAEALN   | 203  |
| ScDrs2p | ECIEDIKRAN   | SKELNNSTI    | EIFSEAHDD-  | -----        | -----       | -----         | -----       | -----       | 293  |
| ScDnf1p | KTVGTSGPRS   | SLDSIDSYRV   | SADYGRPSLD  | YDNLEQGAGE   | AN-----I    | VDRSLPPRTD    | CKFAKNYWK   | VKVGDIIRVIH | 410  |
| ScDnf2p | RNSRSGFGRG   | SLDSIGSYRM   | SADYGRPSLD  | YDNLEQGAGE   | AN-----I    | VDRSLPPRTD    | CKFAKNYWK   | VKVGDIIRVIH | 455  |
| CnAPT1  | MQGRSS----   | -----STENFAA | EPVPGAEPRG  | QDELQRMRSQ   | VSNWDEDPEA  | GD--SPG-      | LGWHRTIWD   | VKVGDFVKIY  | 272  |
| ScDrs2p | -----        | -----        | -----       | -----        | -----       | -----FVEKRWID | IRVGDIIRVK  | 311         |      |
| ScDnf1p | NNDEIPADII   | LLSTSDTGA    | CYVETKNLDG  | ETNLKVRQSL   | KCTNTIRTSK  | DIARTKFWIE    | SEGPSNLYT   | YQG--NMKW   | 487  |
| ScDnf2p | NNDEIPADMI   | LLSTSDTGA    | CYVETKNLDG  | ETNLKVRQSL   | KCSKIIKSSR  | DIARTKFWIE    | SEGPSNLYS   | YQG--NFKW   | 532  |
| CnAPT1  | ENEQFPADIV   | ICATSEEDV    | AYIETKNLDG  | ETNLKSRNGV   | PGLSHLNTAE  | ACAKAHLCID    | LDAPESNMFR  | LNGAVINLEE  | 352  |
| ScDrs2p | SEEPIPADTI   | LLSSSEPEGL   | CYIETANLDG  | ETNLKIKQSR   | VETAKFIDVK  | TLKNMNGKVV    | SEQPNSSLYT  | YEGTM-----  | 386  |
| ScDnf1p | RNLADGEIRN   | EPITINNVL    | RGCTLRNTKW  | AMGVVMFTGG   | DTKIMLNSGI  | TPTKKSIRSR    | ELNFSVINF   | VLLFILCFVS  | 567  |
| ScDnf2p | QDTQNGNIRN   | EPVNINNLL    | RGCTLRNTKW  | AMGVVIFTGD   | DTKIMINAGV  | TPTKKSIRSR    | ELNFSVILNF  | VLLFILCFVA  | 612  |
| CnAPT1  | YD-EDEQHPI   | HPITLETMTL   | RGCVLKNTAW  | VIGIIVYTG    | DTKII RNAGA | TPSKRSKVEK    | QMNQVQIINL  | VILAAIVVC   | 431  |
| ScDrs2p | -TLNDRQI--   | -PLSPDMIL    | RGATLRNTAW  | IFGLVITFGH   | ETKLLRNATA  | TPIKRTAVEK    | IINRQIIRLF  | TVLAILILIS  | 462  |
| ScDnf1p | GIANGVYYDK   | KGRSRFSYEF   | -GTIAGSAA   | TNGFVSFWVA   | VILYQSLVPI  | SLYISVEIK     | TAQAAFIYGD  | VLLYNAK--L  | 643  |
| ScDnf2p | GIVNGVYYKY   | KPRSRDYFEF   | -GTIIGGSAS  | TNGFVSFWVA   | VILYQSLVPI  | SLYISVEIK     | TAQAAFIYTD  | VLLYNAK--L  | 688  |
| CnAPT1  | AVVDHVNVEE   | WDRQAYWML    | FADTSGDNPN  | INGLVTANA    | FITFQNI VPI | SLYISIEAVR    | TIQAAFIYWD  | RDIIKYKDG   | 511  |
| ScDrs2p | SIGN-VIMST   | ADAKHLSYLY   | LEGTNKAGLF  | FKDLFTFW-    | -ILFSNLVPI  | SLFVTVLEIK    | YQAFMIGSD   | LDLYYEK--T  | 536  |
| ScDnf1p | DYPCTPKSWN   | ISDDLGGQVEY  | IFSDKTGTLT  | QNVMEFKKCT   | INGVSY-GRA  | YTEALAGLRK    | RQGDIVETEG  | RREKAEIAKD  | 722  |
| ScDnf2p | DYPCTPKSWN   | ISDDLGGQVEY  | IFSDKTGTLT  | QNVMEFKKCT   | INGVSY-GRA  | YTEALAGLRK    | RQGDIVETEG  | RREKAEIAKD  | 767  |
| CnAPT1  | TTRTTARSWN   | LSDDLGGQIEY  | IFSDKTGTLT  | QNAMIFROQS   | VGGKIYTDGD  | LPPSHPTITH    | QHQPVPVHGH  | DDQDDPIAKS  | 591  |
| ScDrs2p | DTPTVVTRSS   | LVEELGGQIEY  | IFSDKTGTLT  | RNIMEFKSK    | IAGHCYIDKI  | PEDKTATV--    | EDGIEV--G   | YRKFDLKKK   | 611  |
| ScDnf1p | RDTMID-ELR   | ALSGNSQ---   | -FYPEEV--   | TFVSKFVRD    | LKGASGEVQQ  | RCCEHFMLAL    | ALCHSVLVEA  | NPDNPKKLDL  | 794  |
| ScDnf2p | RETMIID-ELR  | SMSDNTQ---   | -FCPEDL--   | TFVSKFVRD    | LKGSSGDHQQ  | KCCHEFLLAL    | ALCHSVLVEP  | NKDDPKKLDL  | 839  |
| CnAPT1  | ASESDSDPK    | KISTEDDPDEI  | KVTLPKEVLA  | TFHDAELDQ    | LEAHDSQSE   | RILHGFFAVL    | GLCHTVL--A  | AETEPGVIEY  | 668  |
| ScDrs2p | LNDPSDED--   | -----        | -----       | -----        | -----S      | PIINDFTLL     | ATCHTVIPEF  | QSD--GSIKY  | 648  |
| ScDnf1p | KAQSPDEAAL   | VATARDVGFS   | FVGKTKKGLI  | IE--MQGIQK   | FEILNILEF   | NSSRKRMSCI    | VKIPGLNPGD  | EPRALLICKG  | 872  |
| ScDnf2p | KAQSPDEAAL   | VSTARQLGYS   | FVGSSKSGLI  | VE--IQGVQK   | EFQVLNVLEF  | NSSRKRMSCI    | IKIPGSTPKD  | EPKALLICKG  | 917  |
| CnAPT1  | KAQSPDEAAL   | VQSAADVGFS   | FRGRDHNILR  | MSTPFSVSD    | EYELHNVLEF  | NSARKRMSCI    | LR---KLDE   | DGRIFLLCKG  | 744  |
| ScDrs2p | QAASPDGAL    | VQGGADLGYS   | FIIIRKNSVT  | VLLLEETGEEK  | EYQLNICEF   | NSTRKRMSAI    | FRFP--      | DGSIKLCKG   | 722  |
| ScDnf1p | ADSI IYSRLS  | RQSGSNSEAT   | LEKTALHLEQ  | YATEGLRTLQ   | IAQRELWSWE  | YEKWNKVDI     | AAASLANRED  | ELEVVDVIE   | 952  |
| ScDnf2p | ADSVIYSRLD   | RTQ--NDATL   | LEKTALHLEE  | YATEGLRTLQ   | LAQRELTSWE  | YERWVKTYDV    | AAASVTNREE  | ELDKVTVIE   | 995  |
| CnAPT1  | ADNVIFERLT   | KDS--NQREM   | REKTDQDLQY  | FASEGLRTLQ   | LAYRILDPQV  | YEQWAKYHN     | ATVALQDREE  | RIESVSSSI   | 822  |
| ScDrs2p | ADTVILERLD   | DEA--NQY     | VEATMRHLED  | YASEGLRTLQ   | LAMRDISEGE  | YEEWNSIYNE    | AATTLDNRAE  | KLDEAANLI   | 798  |
| ScDnf1p | RELILLGGTA   | IEDRLQDGVF   | DCIELLAEAG  | IKLWVLTDGK   | VETAINIGFS  | CNVLNNMEL     | LVIK-----   | TTGDDVKE--  | 1024 |
| ScDnf2p | RELILLGGTA   | IEDRLQDGVF   | DSIALLAEAG  | IKLWVLTDGK   | VETAINIGFS  | CNVLNNMEL     | LVVK-----   | ASGDDVKE--  | 1067 |
| CnAPT1  | RDILLGGATA   | IEDKLQDGVF   | DTISDLKRAE  | IKVWVATGDK   | LETAVAI GYT | TNLLTKDTNL    | IIVVREGHRSI | GDQLREALLE  | 902  |
| ScDrs2p | KNLILIGATA   | IEDKLQDGVF   | ETIHTQEAG   | IKI WVLTDGK  | QETAINIGMS  | CRLLEDMDNL    | LIINE--ET   | RDDTE--     | 870  |
| ScDnf1p | -FGSEPSEIV   | DALLSKYLKE   | YFNL-----   | --TGSEEEI    | FEAKKDHEFP  | KGNVAVITDG    | DALKLALYGE  | DIRRKFLLC   | 1094 |
| ScDnf2p | -FGSDPIQVV   | NNLVTKYLRE   | KFGM-----   | --SGSEEL     | KEAKREHGLP  | QGNFAVITDG    | DALKVALNGE  | EMRRKFLLC   | 1137 |
| CnAPT1  | FFGEDAG--L   | RTTLRSRIDS   | RNSMDPPRLT  | RVNTGVRSLV   | ---GRDNGTR  | PGGFSLVIEG    | HALAHCFDDE  | ETEAALLLS   | 977  |
| ScDrs2p | -----        | RNLLKEI--    | -----       | --NALNEHQL   | ---STHDMK   | -SLALVIDG     | KSLGFALEPE  | -LEDYLTV    | 918  |
| ScDnf1p | KNCRAVLCRR   | VSPSQKAAV    | KLVKDSL DVM | TLATGDGSDN   | VAMIQSADV   | IGIAGEEGRQ    | AVMCSDYAIG  | QFRYLARLVL  | 1174 |
| ScDnf2p | KNCKAVLCRR   | VSPAQAQAAV   | KLVKKTL DVM | TLATGDGSDN   | VAMIQSADV   | VGIAGEEGRQ    | AVMCSDYAIG  | QFRYVTRVL   | 1217 |
| CnAPT1  | TRCNTVLCRR   | VSPQLQAQIV   | HLIKNDL DVM | CLAI GDGAND  | VAMIQAADVG  | VGISGEEGLQ    | AVNCSDYAIA  | QFRYLKRLLL  | 1057 |
| ScDrs2p | KLCKAVLCRR   | VSPQLKALVV   | KMKVKRSSSL  | L LAI ASGAND | VSMIQAADV   | VGISGMEGMC    | AARSADIALG  | QKFLKLL     | 998  |

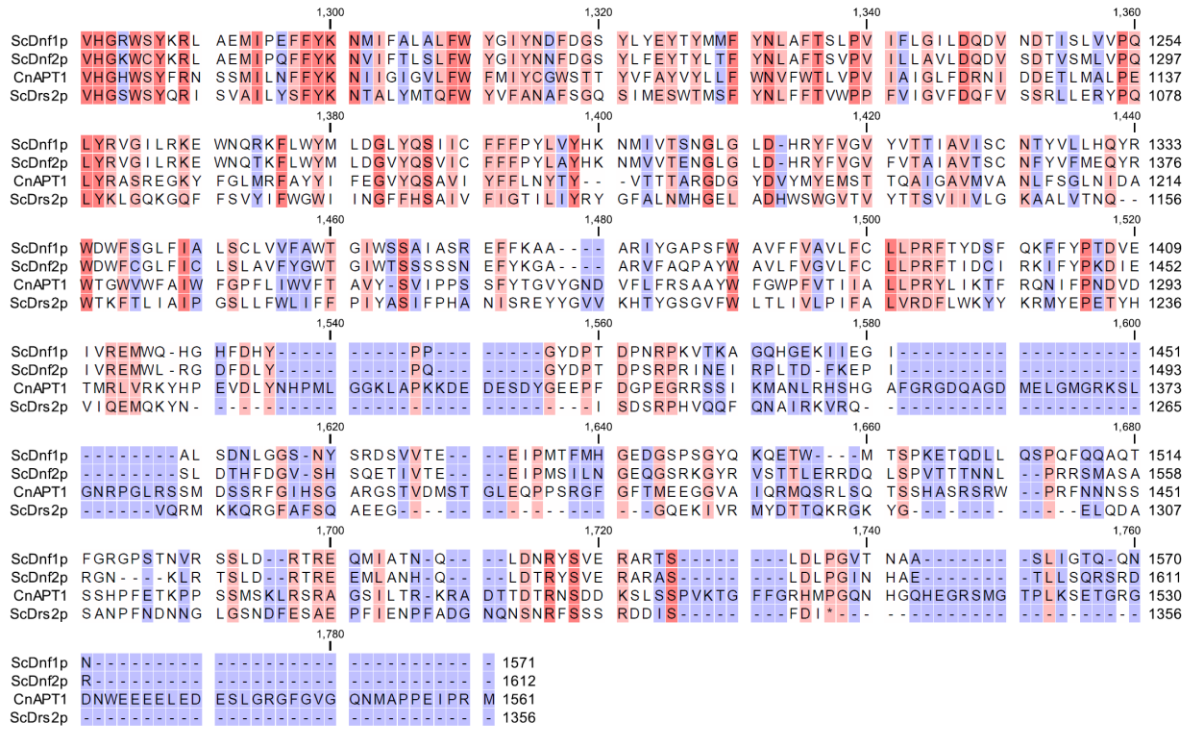

**Supplementary Figure S2. Sequence alignment of Apt1p and its nearest orthologs in *S. cerevisiae*.** The sequences were aligned with Mega X using MUSCLE. Positions are coloured blue to red according to increasing sequence identity. For accession numbers, see Materials and methods.

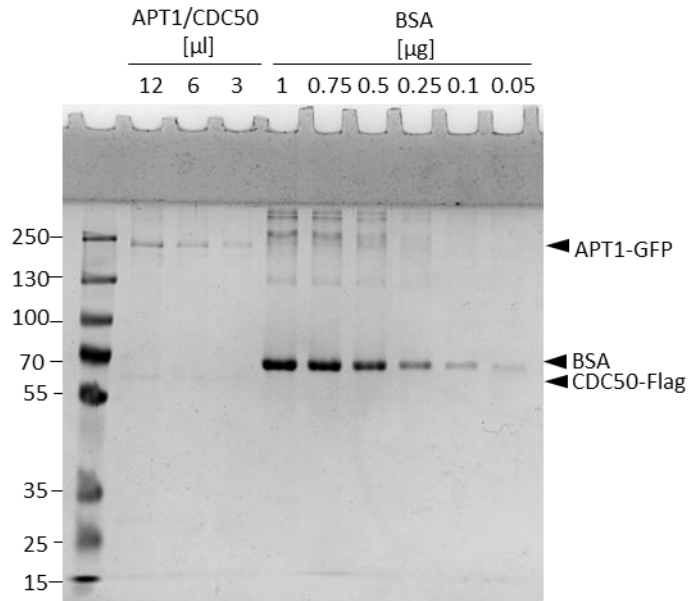

**Supplementary Figure S3. Quantification and visualization of the purified Apt1p-GFP/Cdc50a-FLAG.** Purified Apt1p-GFP/Cdc50a-FLAG were subjected to SDS-PAGE followed by Coomassie Brilliant Blue staining. By comparing the band intensity of the purified protein with that of BSA, the concentration of Apt1p-GFP was estimated to be approximately  $6.4 \text{ ng } \mu\text{l}^{-1}$ . Molecular mass markers (M) and the molecular mass (kDa) are shown on the left. Band intensities were quantified using Image Lab™ Software from Bio-Rad.

**Supplementary Table S1. Primers used in this study.**

| Set | Name                        | Sequence                                          |
|-----|-----------------------------|---------------------------------------------------|
| #1  | <i>APT1_F</i>               | 5'-AAAAAACCCCGGATCCATGGGCGCCTCCAAACC-3'           |
|     | <i>APT1_R</i>               | 5'-GTCGTATTACGGATCCTTACATCCTCGGTATTTCTGGTGGG -3'  |
| #2  | <i>Spacer-myc-for</i>       | 5'-GGTTCGTGTTCTGAACAGAAGTTGATTTCCG-3'             |
|     | <i>Spacer-myc-rev</i>       | 5'-AGAACCAGAACCCATCCTCGGTATTTCTGG-3'              |
| #3  | <i>APT1_Frag. 1. FOR</i>    | 5'-AAAAAACCCCGGATCCATGGGCGCCTCC-3'                |
|     | <i>APT1-spacerGFP-rev</i>   | 5'-CTCACCATAGAACCAGAACCAGAACCAGAACCC -3'          |
| #4  | <i>spacer-eGFP-for</i>      | 5'-TGGTTCTATGGTGAGCAAGGGCGAG-3'                   |
|     | <i>eGFP-rev</i>             | 5'-GTCGTATTACGGATCCTTACTTGTACAGCTCGTCCATGCC -3'   |
| #5  | <i>CDC50_F</i>              | 5'-CACTAAAGGGCGGCCGCATGGCCATATTCAACAGGAAGCC-3'    |
|     | <i>CDC50_R</i>              | 5'-GATACTAGTGCGGCCGCTTATAATCCATTTGCGTTGGGCTGGT-3' |
| #6  | <i>CDC50_F</i>              | 5'-CACTAAAGGGCGGCCGCATGGCCATATTCAACAGGAAGCC-3'    |
|     | <i>CDC50_R without Stop</i> | 5'-GATACTAGTGCGGCCGCTAATCCATTTGC-3'               |
| #7  | <i>Dead-Mut for</i>         | 5'-CCTCGACGGTcAAACCAACTT-3'                       |
|     | <i>Dead-Mut rev</i>         | 5'-TTTTTGGTTTCGATGTACGC-3'                        |
